# Supplementary material for: Hydrophobic Barriers for Directing Physarum polycephalum Propulsion and Navigation
Source: PubMed Central journal article supplement — ACS Omega. 2023 Oct 25;8(44):41649–54. doi: 10.1021/acsomega.3c05560 (PMC10634242; doi:10.1021/acsomega.3c05560), 2023-10-25
Supplement: ao3c05560_si_001.pdf [file ao3c05560_si_001.pdf]

**Supporting Information for**

**Hydrophobic Barriers for Directing *Physarum polycephalum* Propulsion and Navigation**

Taeha Lee<sup>a, b</sup>, Dain Kang<sup>a</sup>, Minsu Kim<sup>a</sup>, Sukyung Choi<sup>a</sup>, Da Yeon Cheong<sup>a, b</sup>, Seokbeom Roh<sup>a, b</sup>, Seung Hyeon Oh<sup>a, b</sup>, Insu Park<sup>c, \*</sup>, Gyudo Lee<sup>a, b, \*</sup>

<sup>a</sup>Department of Biotechnology and Bioinformatics, Korea University, Sejong 30019, South Korea

<sup>b</sup>Interdisciplinary Graduate Program for Artificial Intelligence Smart Convergence Technology, Korea University, Sejong 30019, South Korea

<sup>c</sup>Department of Biomedical Engineering, Konyang University, Daejeon 35365, South Korea

\*Corresponding author: I.P. (E-mail: insupark@konyang.ac.kr); G.L. (E-mail: lkd0807@korea.ac.kr)

# Table of Contents

1. Overgrowth and network formation of *P.polycephalum* according to distribution of multiple nutritional sources
2. Subculture conditions of *P.polycephalum*
3. *P.polycephalum* growth rate equation
4. Multidirectional growth of *P.polycephalum* in response to spatially dispersed nutrient sources
5. The migration length of *P.polycephalum* over time

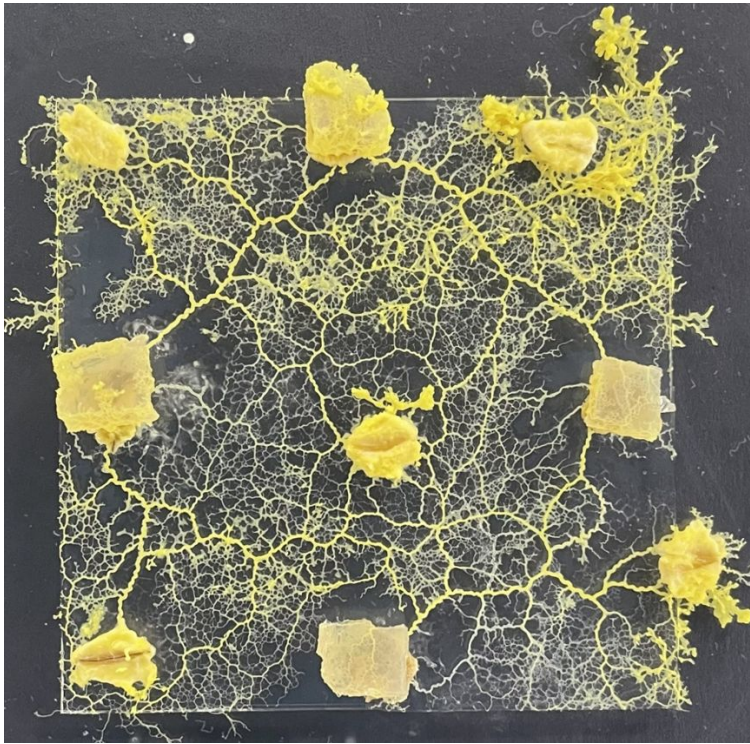

**Figure S1.** Overgrowth and network formation between *P.polycephalum* (north, south, east, and west) according to the distribution of multiple nutritional sources (center, northeast, northwest, southeast, and southwest).

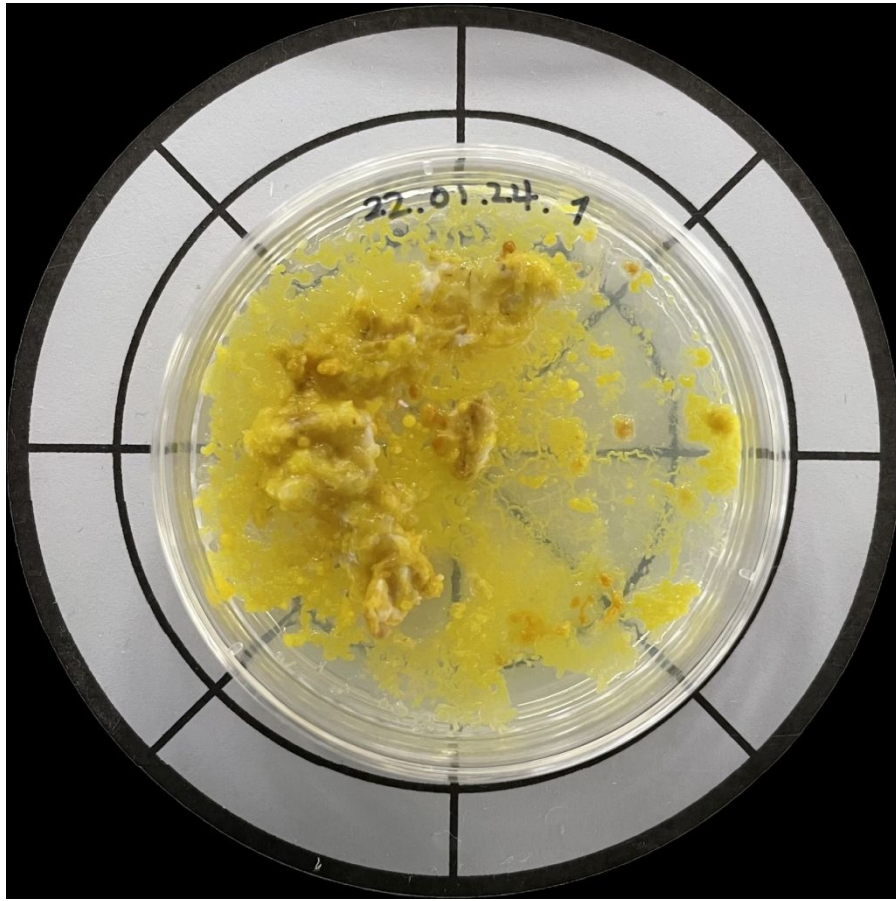

**Figure S2.** Subculture conditions (growth media with oatmeal) of *P.polycephalum*. *P.polycephalum* was fully cultured for 48 hours and subsequently subcultured to several petri dishes by dicing ( $1 \times 1 \text{ cm}^2$ ).

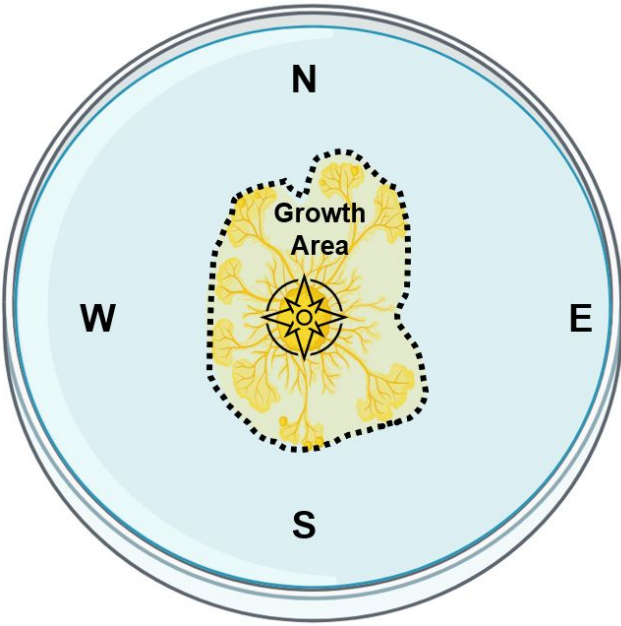

$$\text{Growth rate (\%)} = \frac{\text{Growth Area}}{\text{Initial Area}} \times 100 (\%)$$

**Figure S3.** *P.polycephalum* growth rate equation.

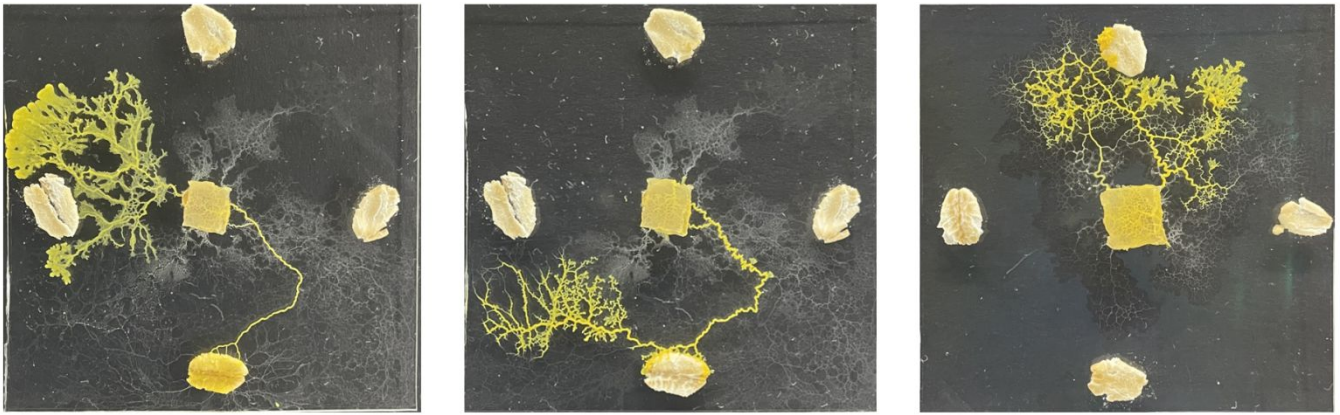

**Figure S4.** Multidirectional growth (24 hours) of *P.polycephalum* in response to spatially dispersed nutrient sources.

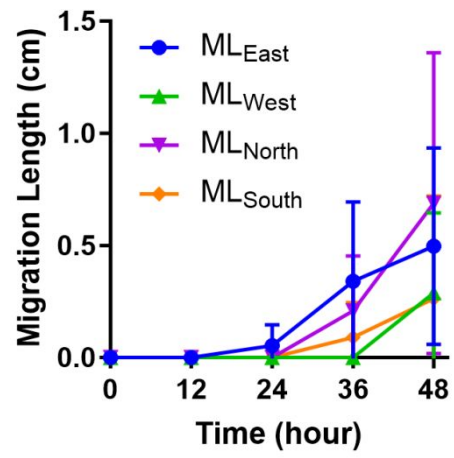

**Figure S5.** The plot of the migration length (ML<sub>East</sub>, ML<sub>West</sub>, ML<sub>North</sub>, and ML<sub>South</sub>) of *P. polycephalum* over time in the absence of hydrophobic barrier (Figure 4a).
